# Supplementary material for: Intragenic suppressor mutations of the COQ8 protein kinase homolog restore coenzyme Q biosynthesis and function in Saccharomyces cerevisiae
Source: PubMed Central journal article supplement (PMC7263595; doi:10.1371/journal.pone.0234192), 2020-06-01

**S1 Fig. Sporulation of NPD-C diploid yeast with tetrad dissection and test for 2:2 segregation of growth on YPG plate medium**

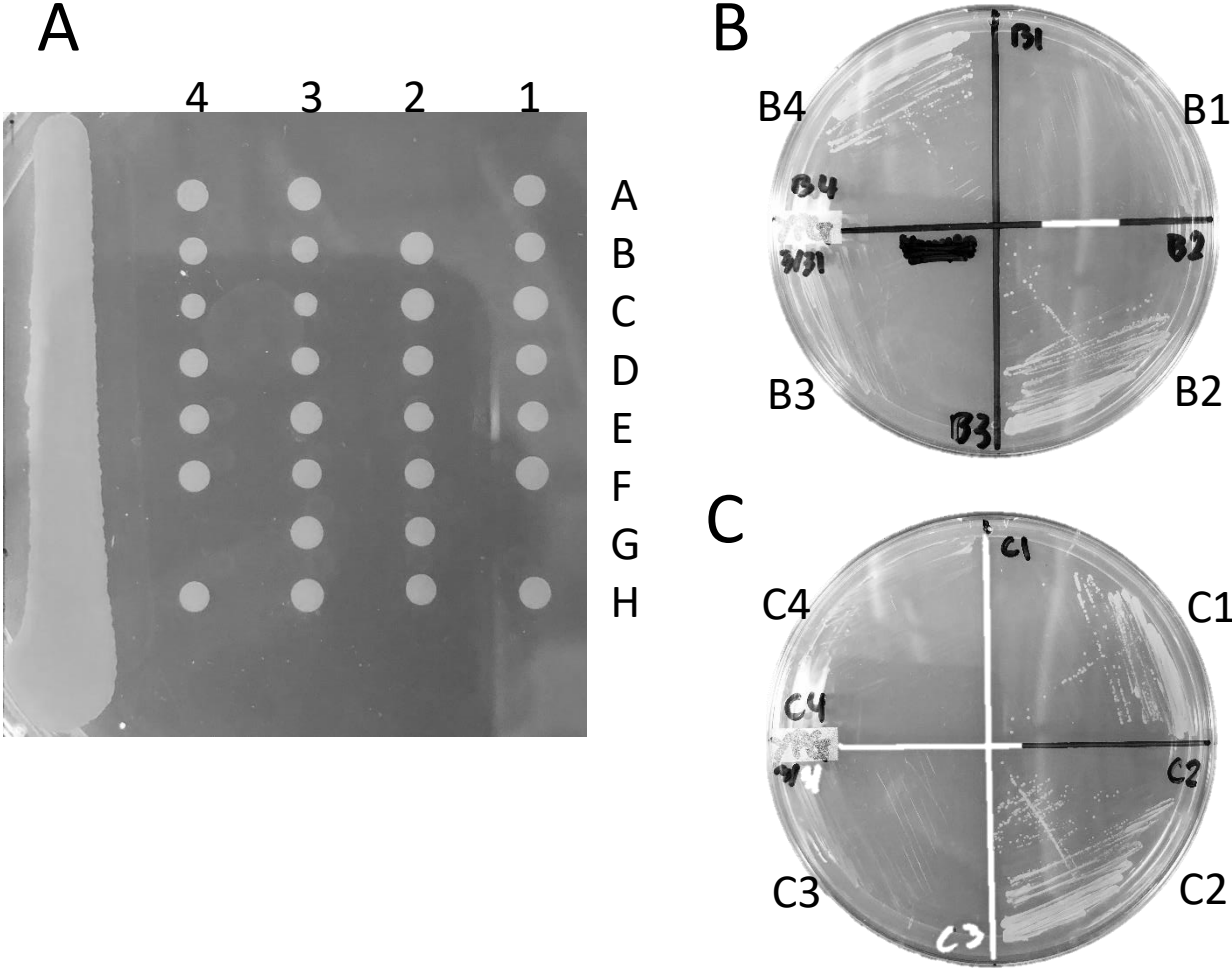

Supplement: pone.0234192.s001.pdf [file pone.0234192.s001.pdf]
