# Supplementary material for: Intragenic suppressor mutations of the COQ8 protein kinase homolog restore coenzyme Q biosynthesis and function in Saccharomyces cerevisiae
Source: PubMed Central journal article supplement (PMC7263595; doi:10.1371/journal.pone.0234192), 2020-06-01

**S4 Fig. Unedited and uncropped full image western blots, Round 1**

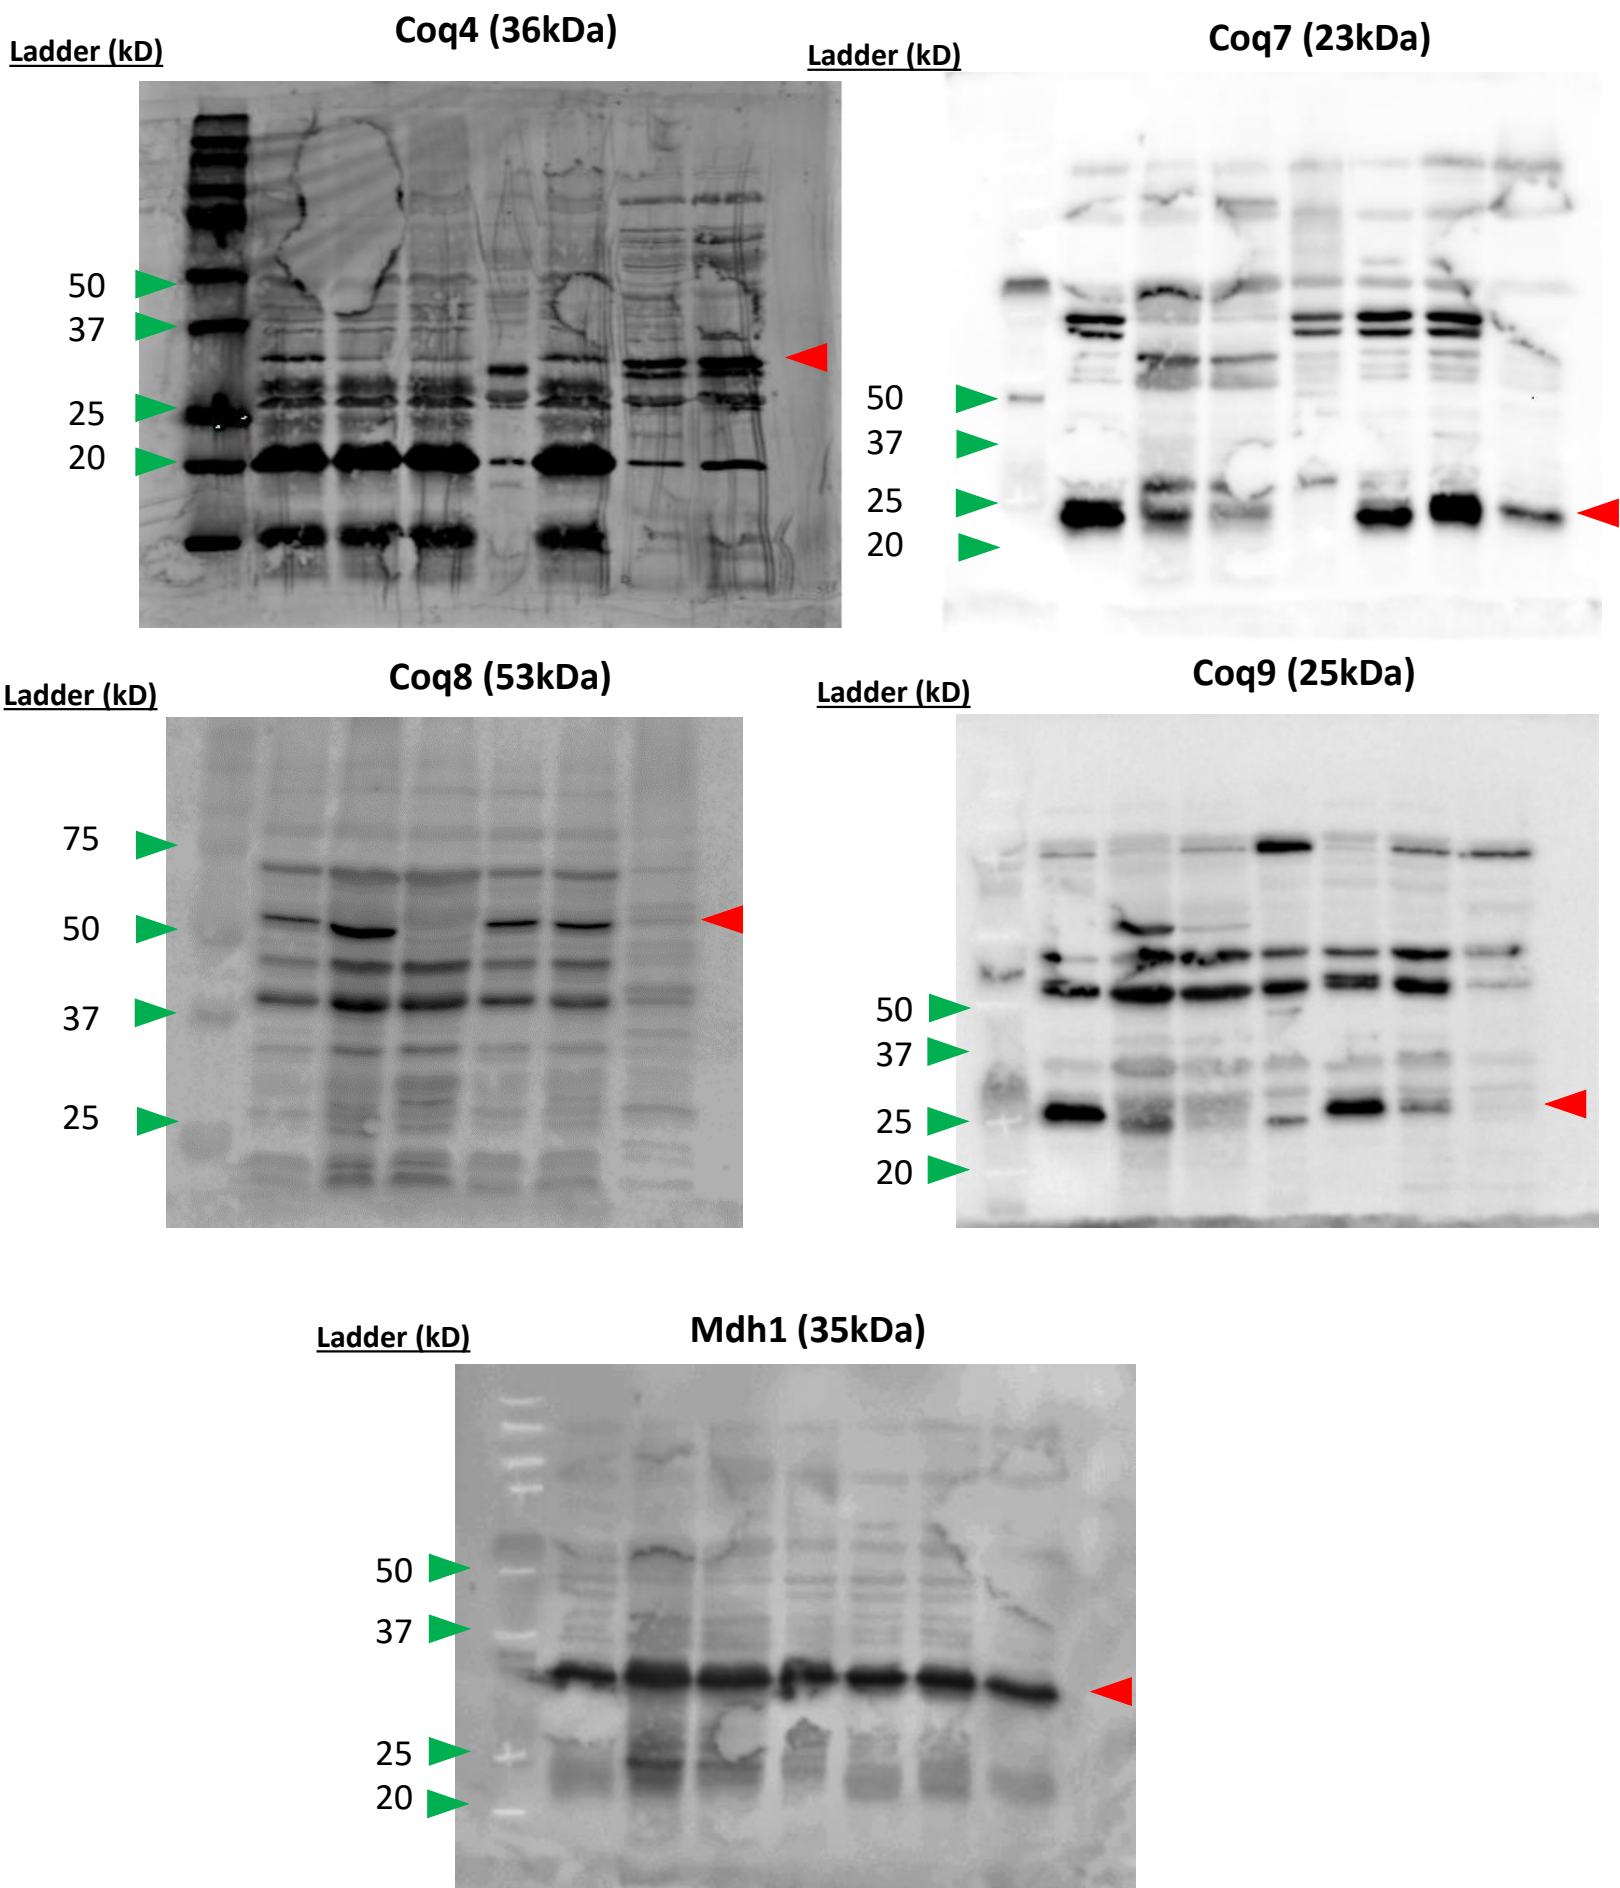

Supplement: pone.0234192.s004.pdf [file pone.0234192.s004.pdf]
