# Supplementary material for: Intragenic suppressor mutations of the COQ8 protein kinase homolog restore coenzyme Q biosynthesis and function in Saccharomyces cerevisiae
Source: PubMed Central journal article supplement (PMC7263595; doi:10.1371/journal.pone.0234192), 2020-06-01
Supplement: pone.0234192.s006.pdf [file pone.0234192.s006.pdf]

**S6 Fig. Coq4 blot validated again to affirm results of the respective blot from S5 Fig.**

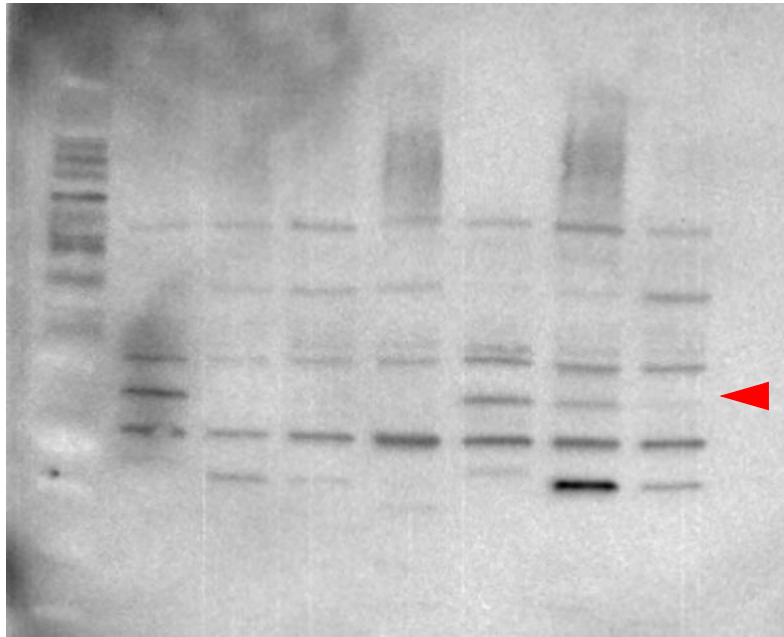

\*This is the one used in the revised panel

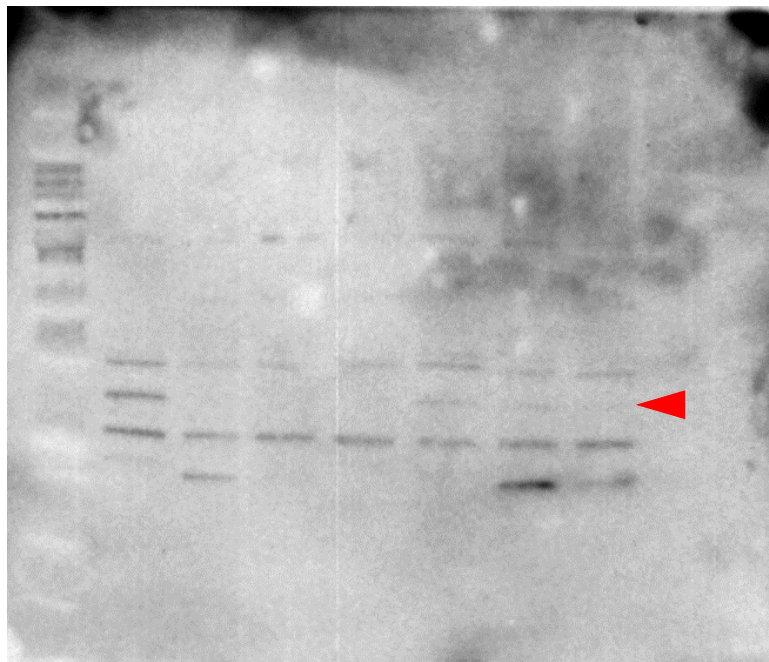

\*This to validate the top result
