# Supplementary material for: Intragenic suppressor mutations of the COQ8 protein kinase homolog restore coenzyme Q biosynthesis and function in Saccharomyces cerevisiae
Source: PubMed Central journal article supplement (PMC7263595; doi:10.1371/journal.pone.0234192), 2020-06-01

**S7 Fig. Validation of experiment of Figure 3B, phenotype rescue as a result of plasmid expression**

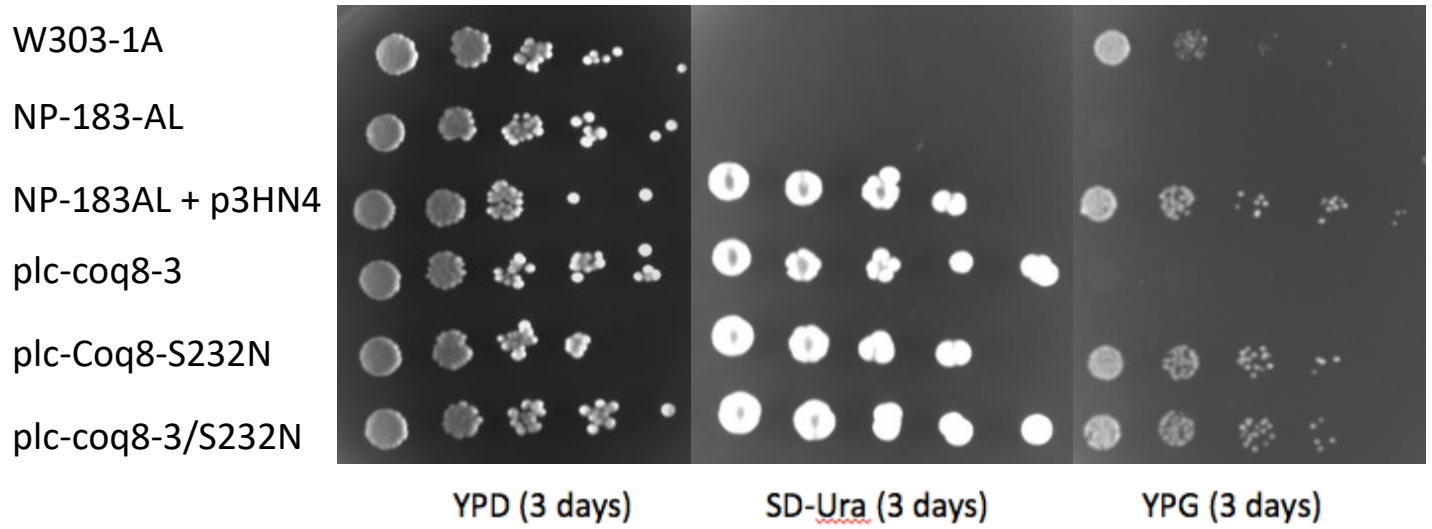

Supplement: pone.0234192.s007.pdf [file pone.0234192.s007.pdf]
