# Supplementary material for: Intragenic suppressor mutations of the COQ8 protein kinase homolog restore coenzyme Q biosynthesis and function in Saccharomyces cerevisiae
Source: PubMed Central journal article supplement (PMC7263595; doi:10.1371/journal.pone.0234192), 2020-06-01

S8 Fig. Validation of experiment in Fig 2, plate dilution assay and growth on YPD and YPG plate medium

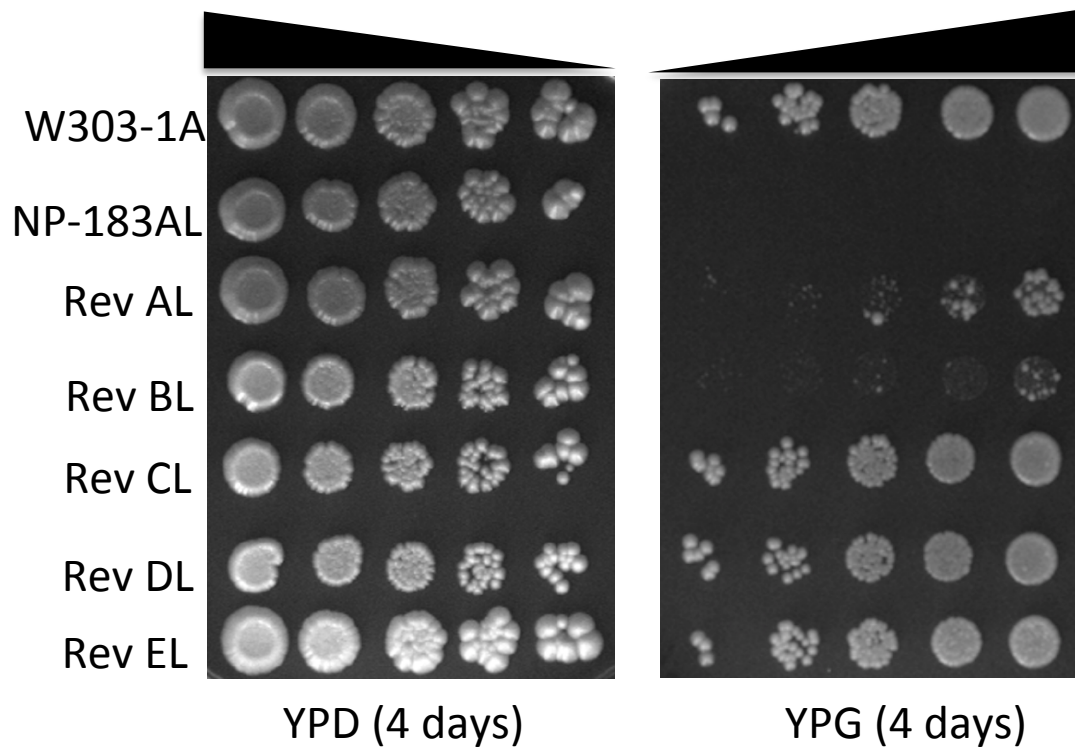

Supplement: pone.0234192.s008.pdf [file pone.0234192.s008.pdf]
