# Supplementary material for: Intragenic suppressor mutations of the COQ8 protein kinase homolog restore coenzyme Q biosynthesis and function in Saccharomyces cerevisiae
Source: PubMed Central journal article supplement (PMC7263595; doi:10.1371/journal.pone.0234192), 2020-06-01

**S5 Fig. Unedited and uncropped full image western blots, Round 1**

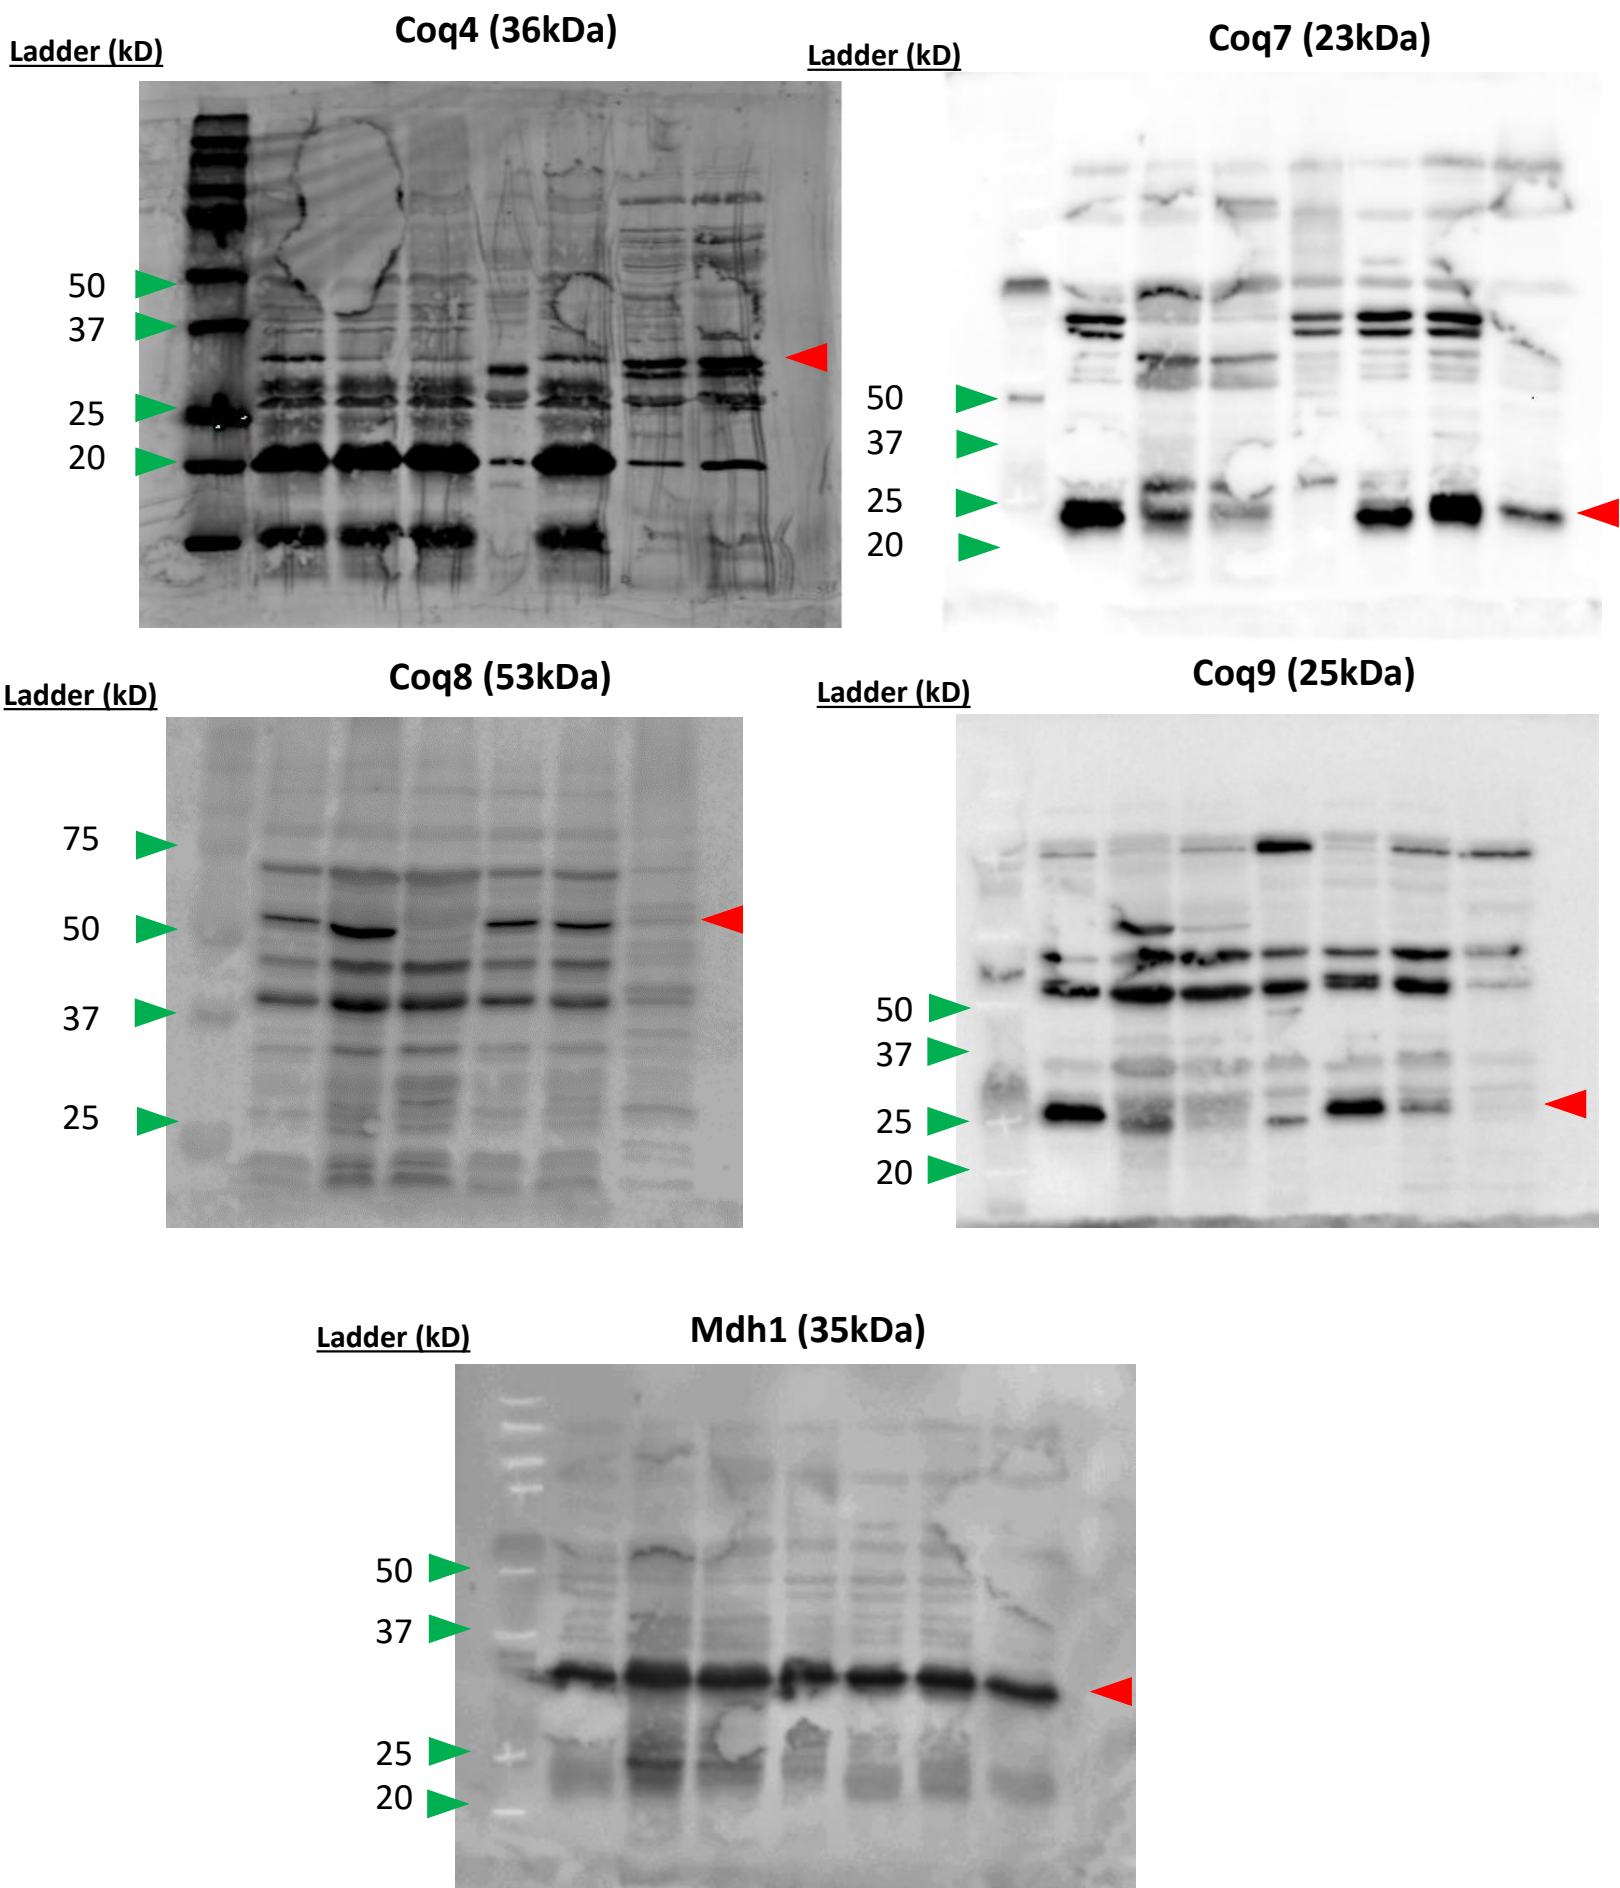

**S6 Fig. Unedited and uncropped full image western blots, Round 2  
and used in Figure 10**

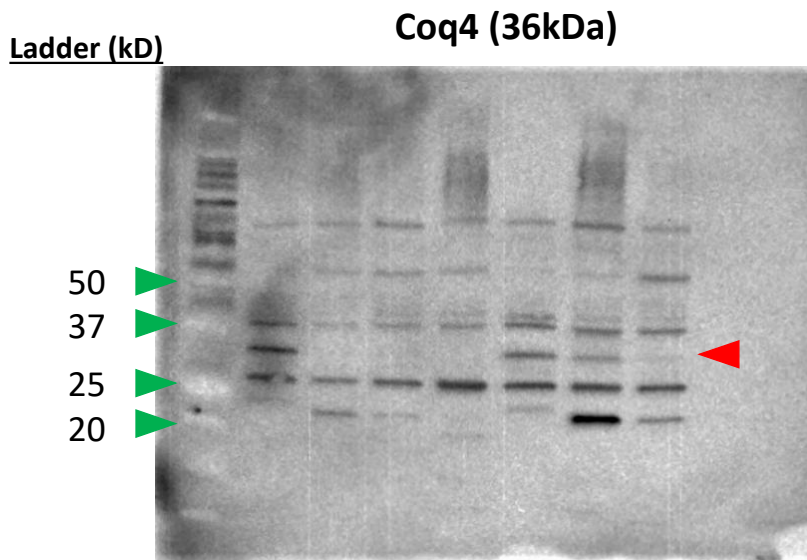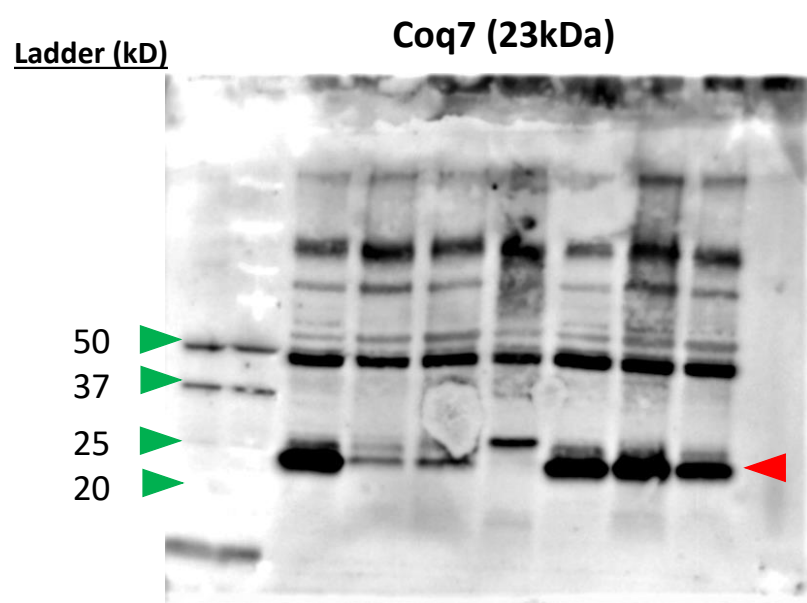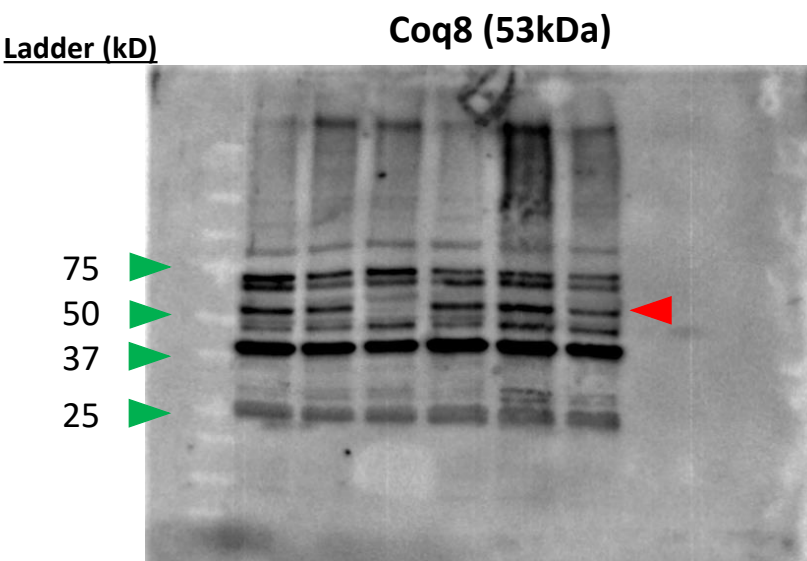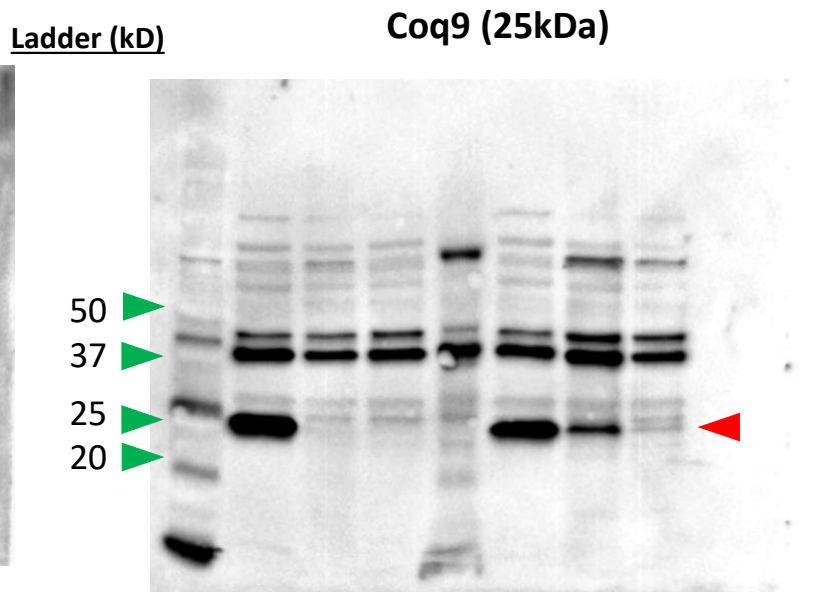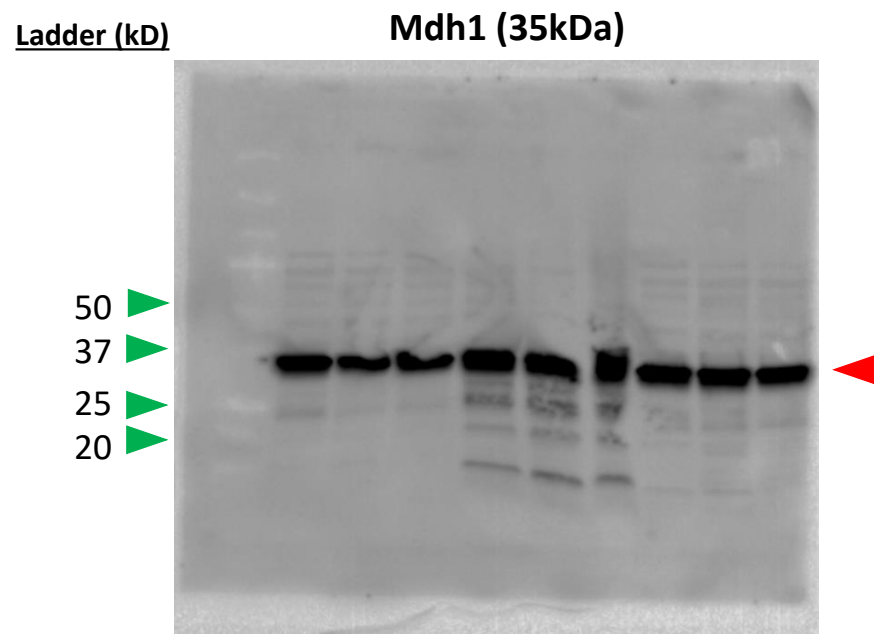

**S7 Fig. Coq4 blot validated twice more to affirm results of the respective blot from S6 Fig.**

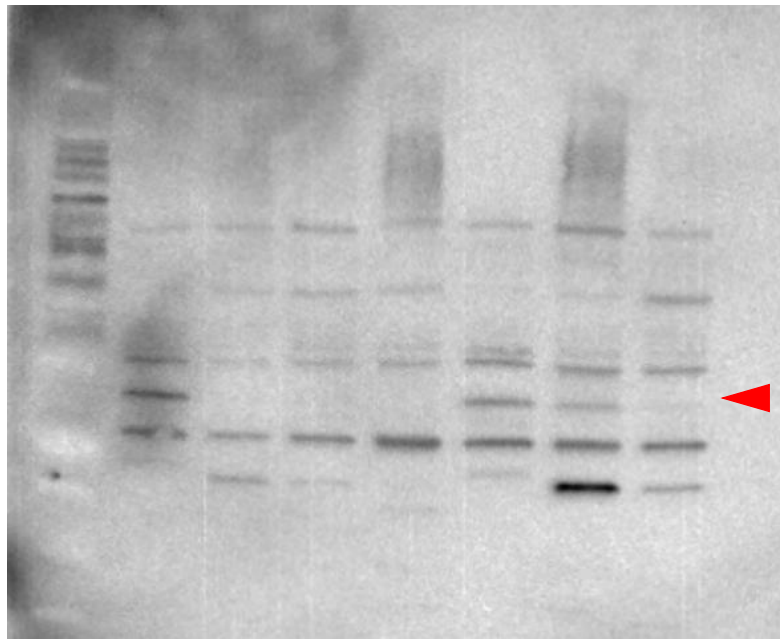

\*This is the one used in the revised panel

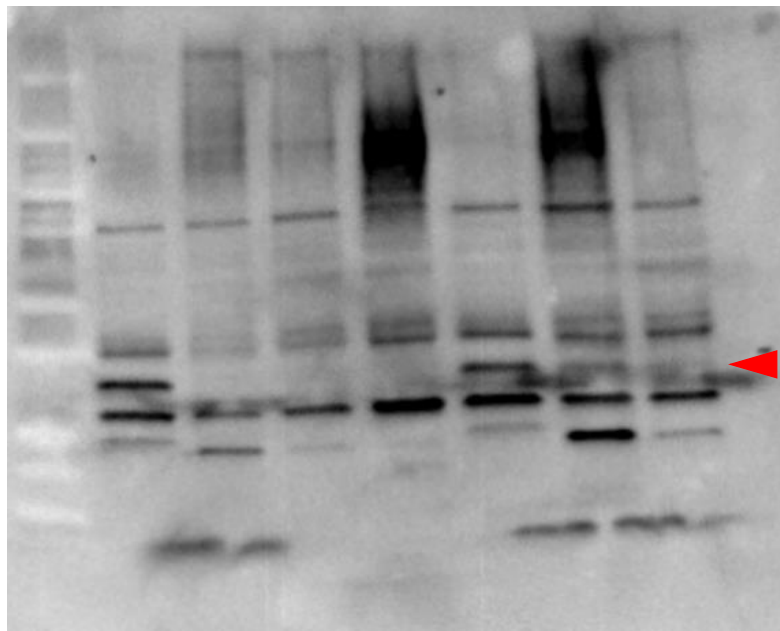

\*These two are to validate the top result

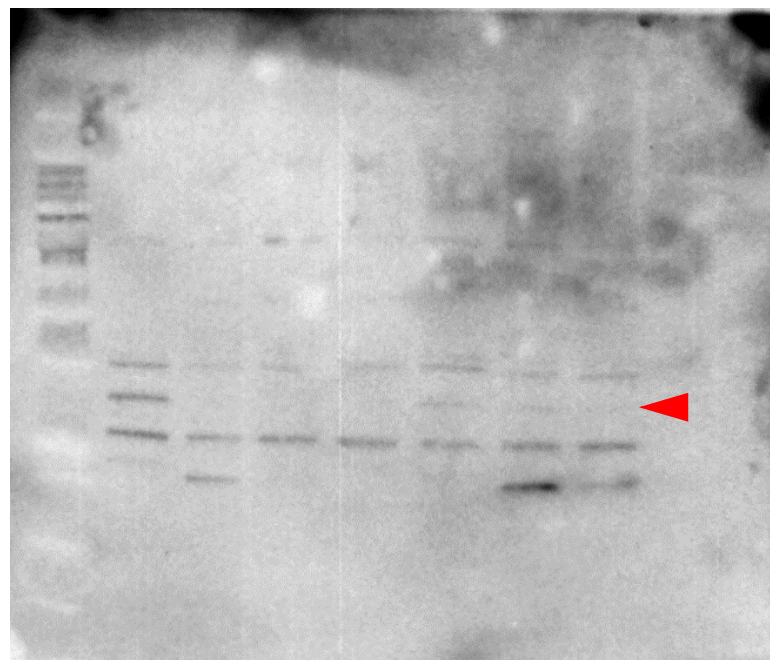

Supplement: pone.0234192.s010.pdf [file pone.0234192.s010.pdf]
